# Supplementary material
Source: PubMed Central journal article supplement (PMC8051864)

# Original immunoblot images (part 1)

Fig. 2c

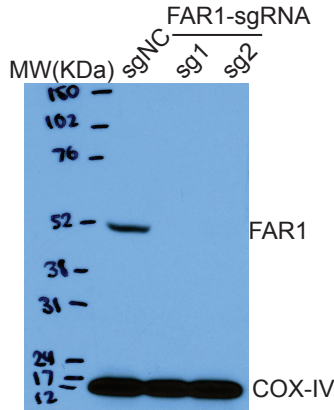

Fig. 2e

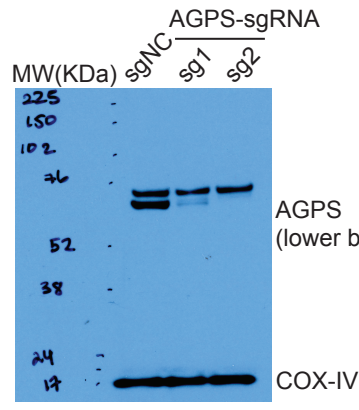

Fig. 3d

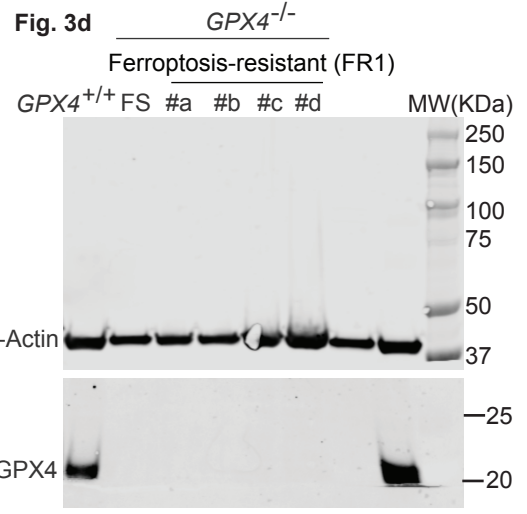

Fig. 3f

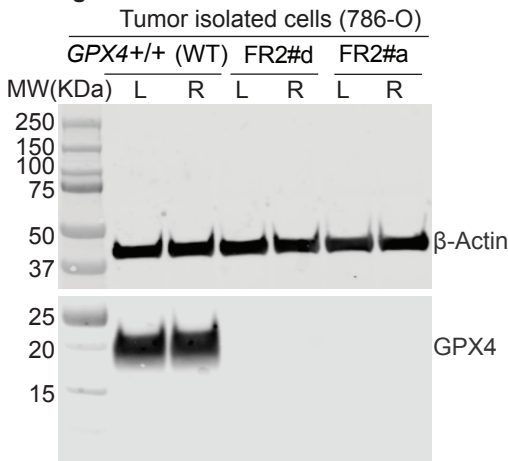

Extended Data Fig. 2c

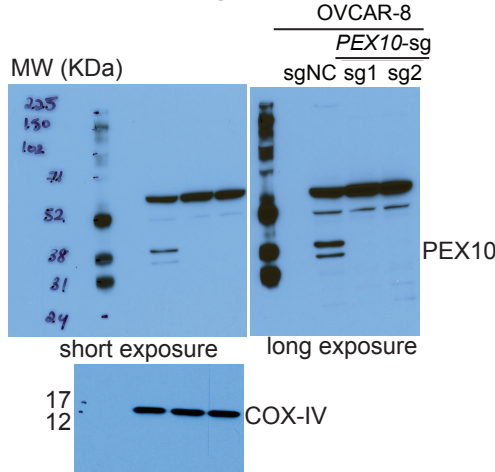

Extended Data Fig. 3j

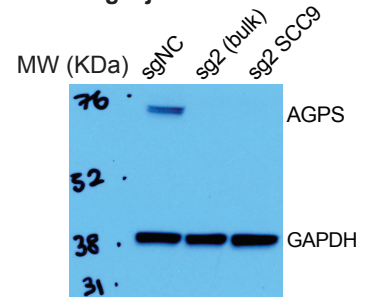

Extended Data Fig. 3i

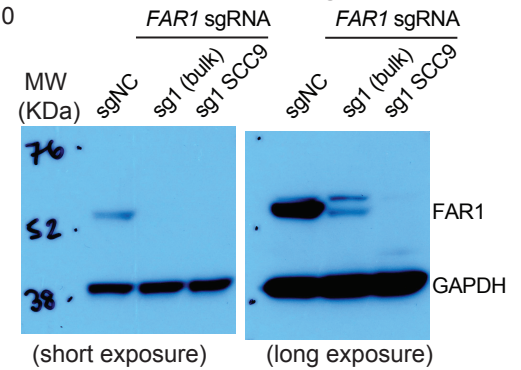

Fig. 3j

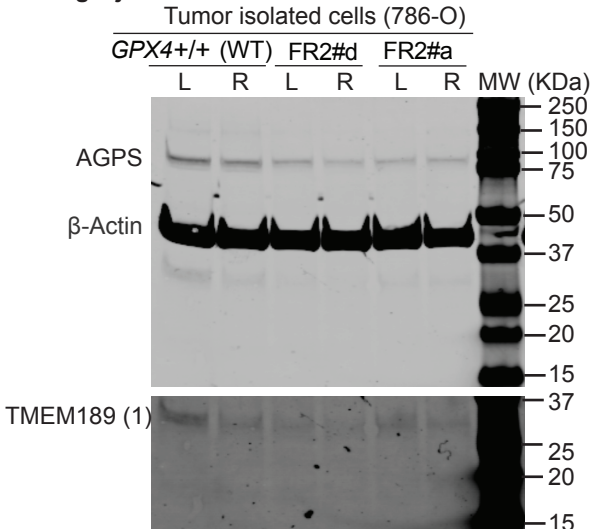

Extended Data Fig. 3f

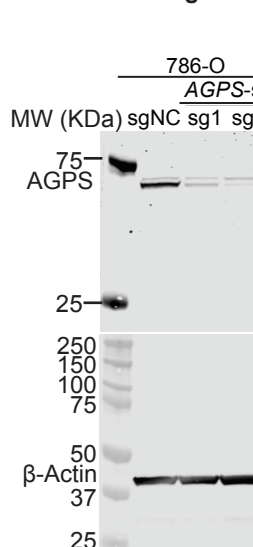

Extended Data Fig. 3h

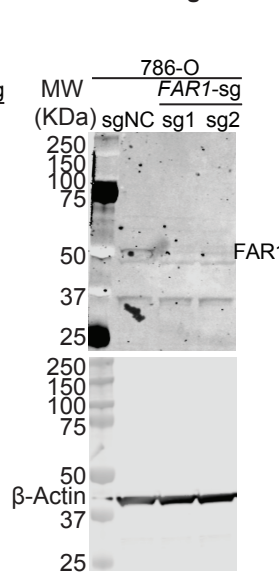

Extended Data Fig. 6c

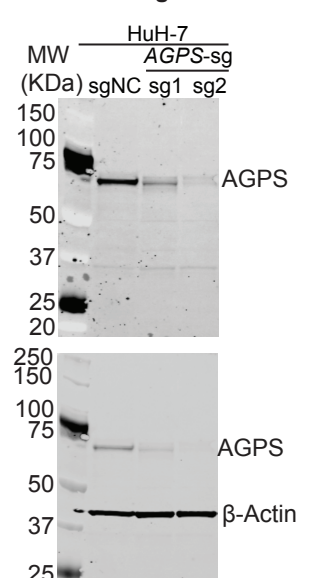

# Original immunoblot images (part 2)

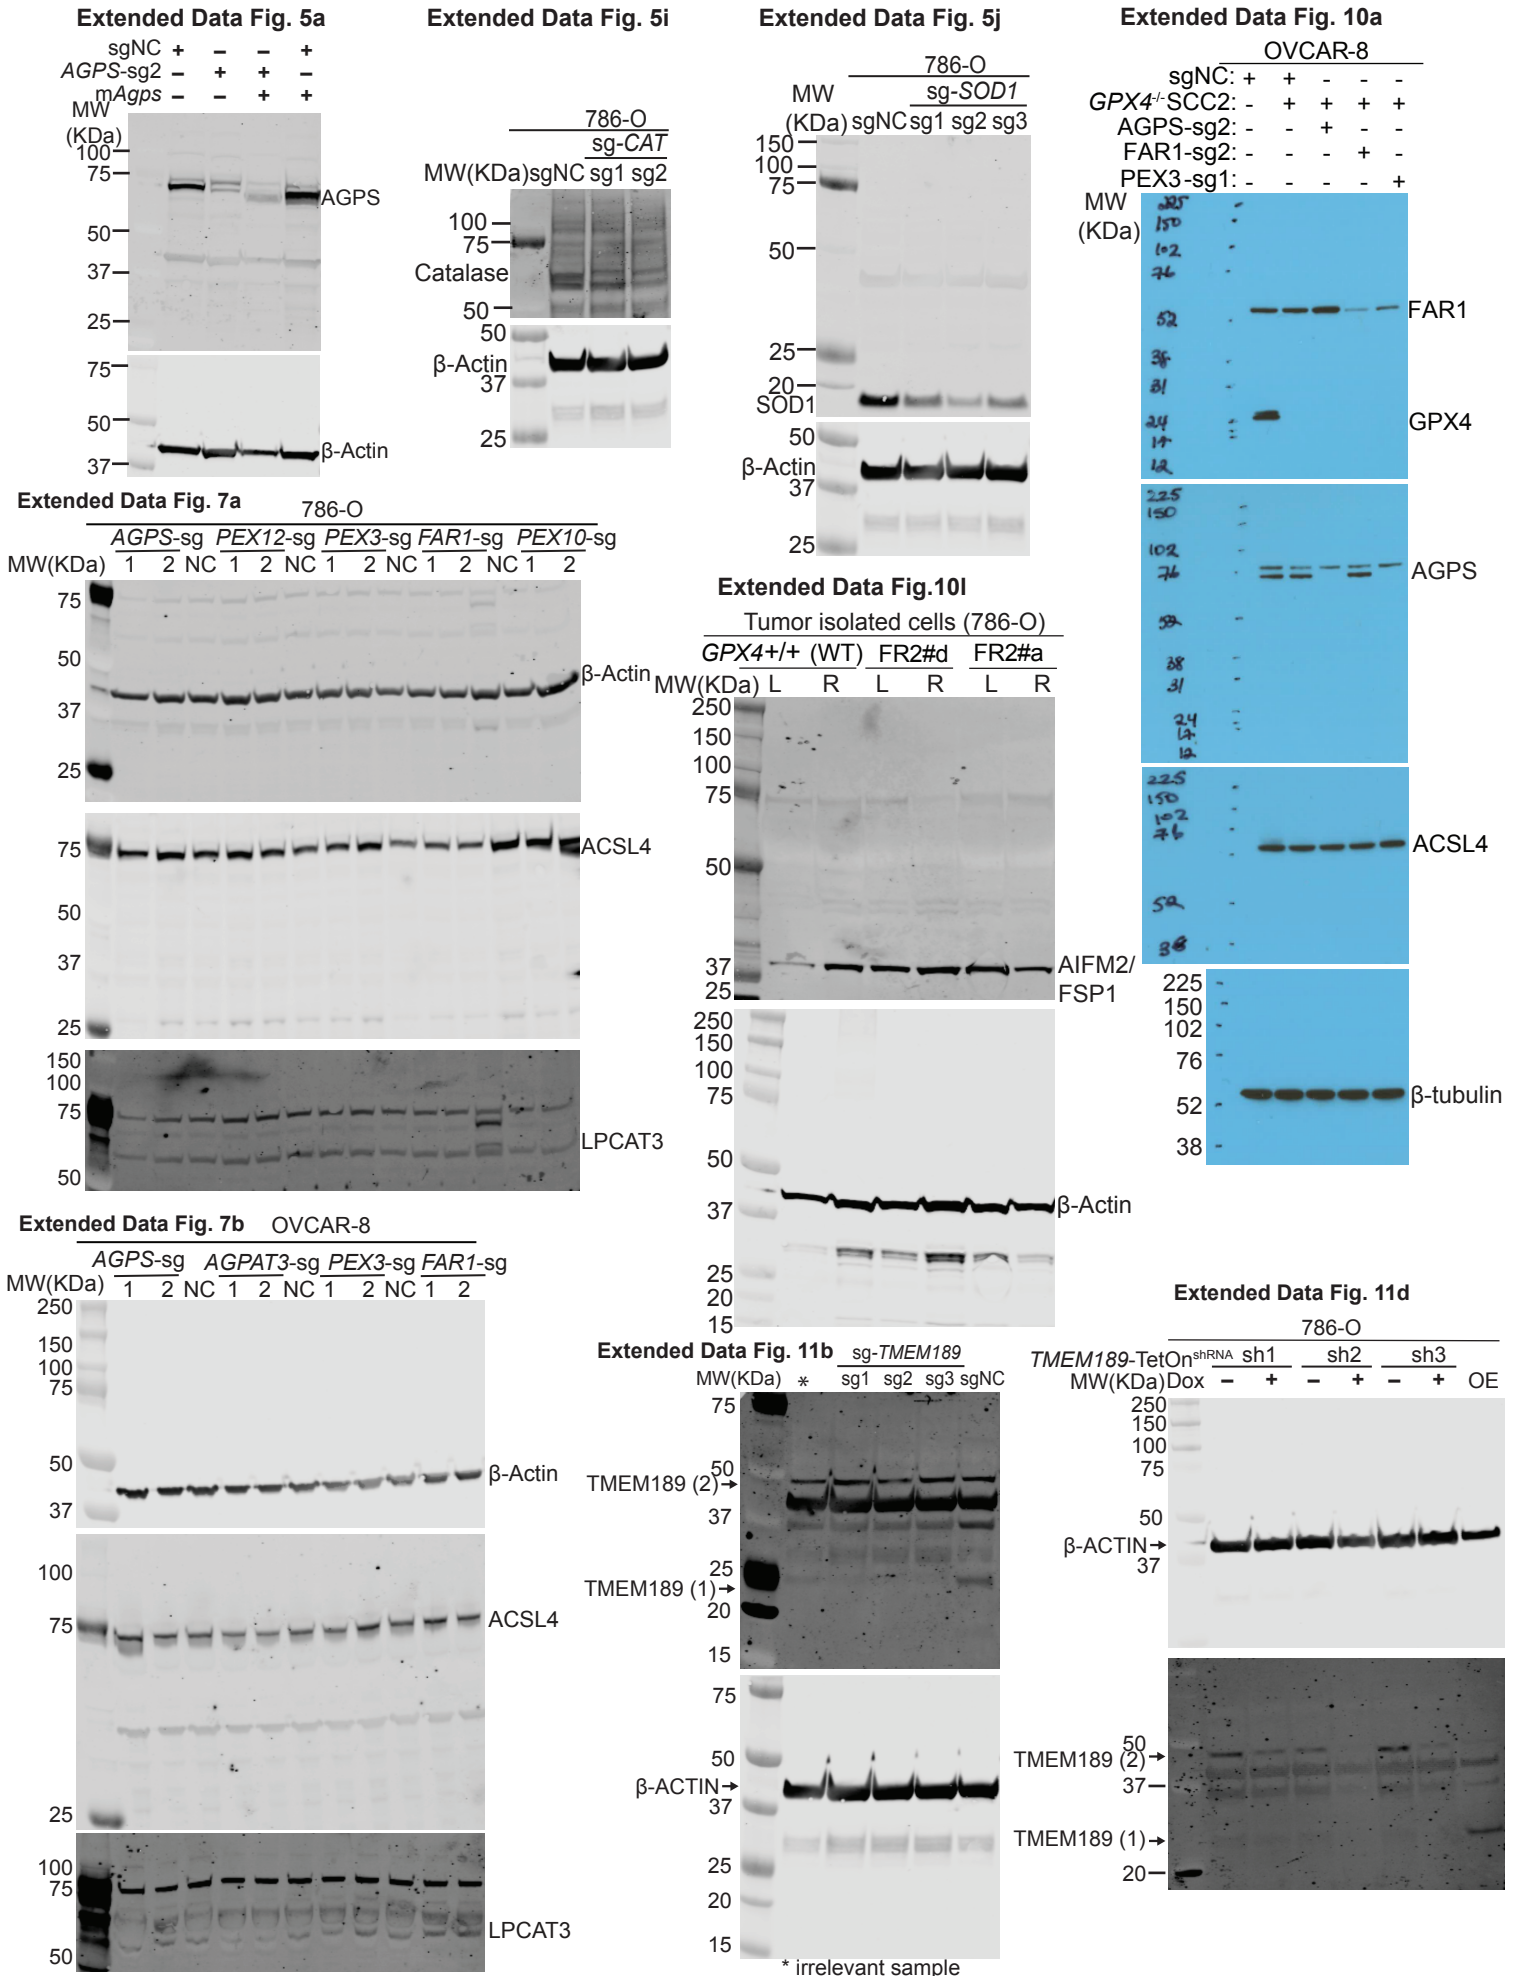

\* irrelevant sample

# Original immunoblot images (part 3)

Extended Data Fig. 7c

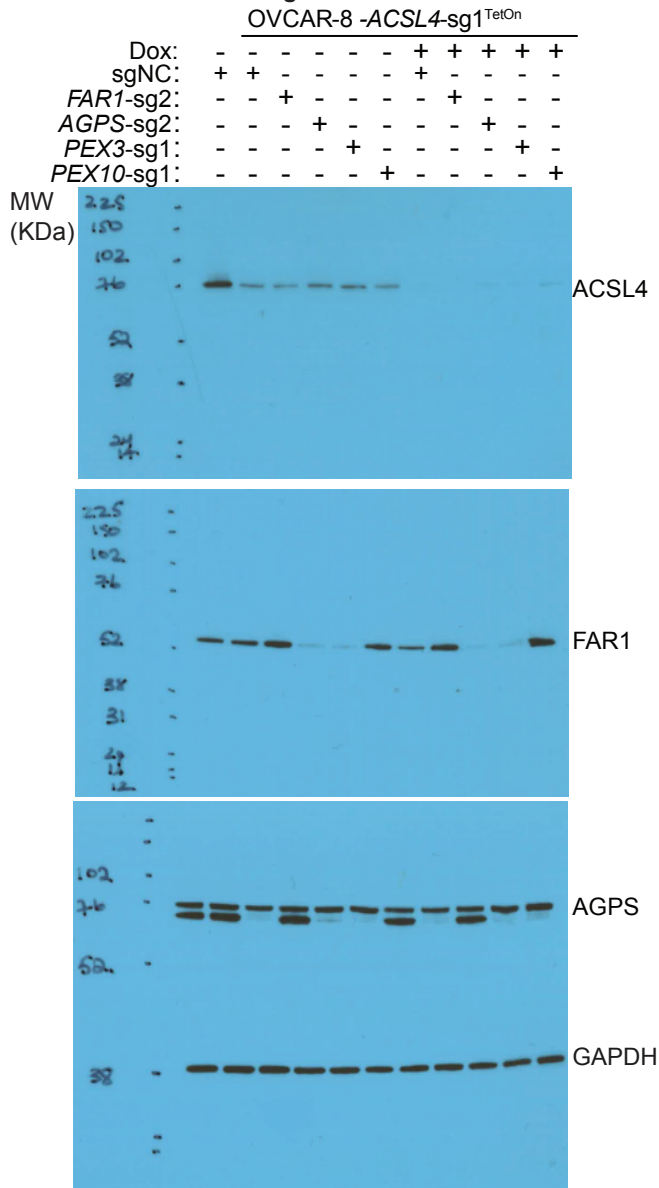

Extended Data Fig. 11f

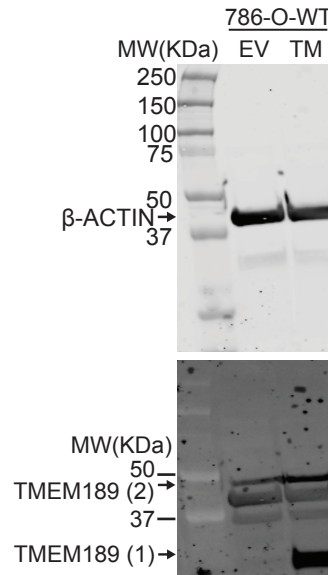

Extended Data Fig. 12b

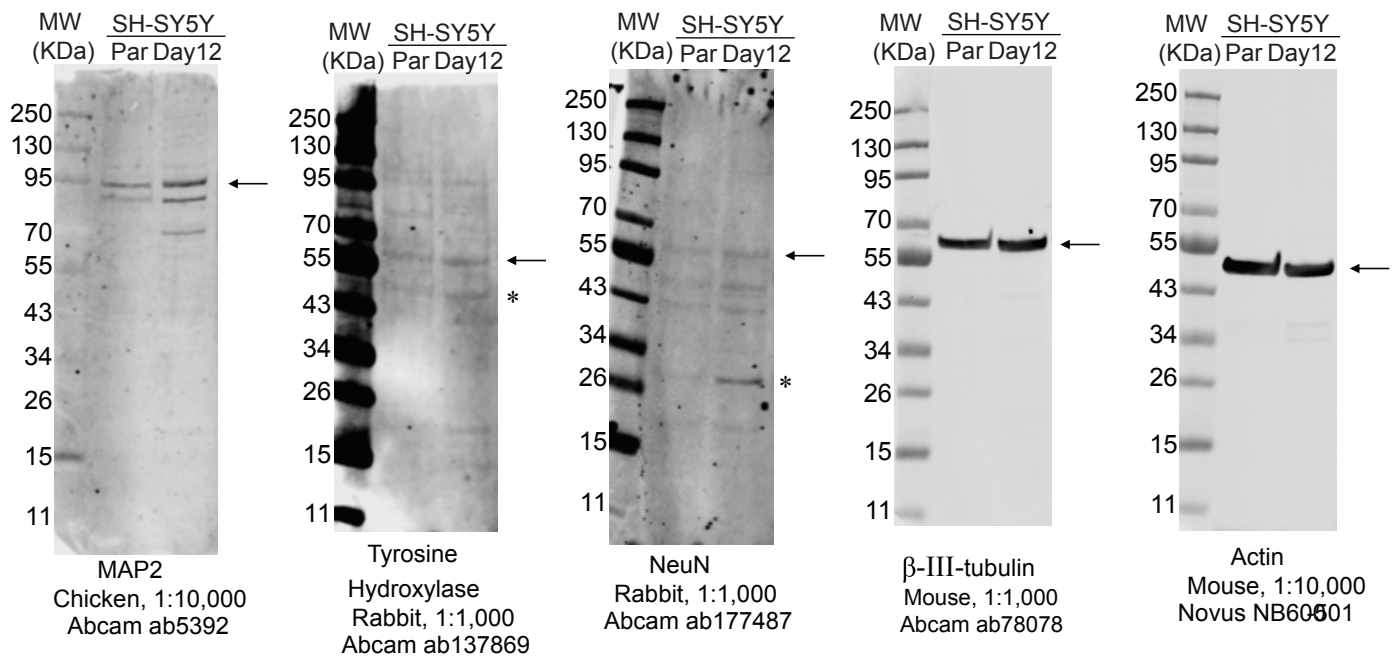

Supplement: NIHMS1684471-supplement-Supplementary_Figures.pdf [file NIHMS1684471-supplement-Supplementary_Figures.pdf]
